# Supplementary material
Source: PubMed Central journal article supplement (PMC6142930)
Supplement: jamaneurol-75-962-s001.pdf [file jamaneurol-75-962-s001.pdf]

## Supplementary Online Content

Pennell PB, French JA, Harden CL, et al. Fertility and birth outcomes in women with epilepsy seeking pregnancy. *JAMA Neurol*. Published online April 30, 2018.  
doi:10.1001/jamaneurol.2018.0646

**eTable.** Analysis of maximum likelihood estimates of time to pregnancy

This supplementary material has been provided by the authors to give readers additional information about their work.

**eTable.** Analysis of maximum likelihood estimates of time to pregnancy

| <b>Label</b>                | <b>Chi-Square</b> | <b>Pr &gt; ChiSq</b> | <b>Hazard Ratio</b> | <b>95% Hazard Ratio Confidence Limits</b> |       |
|-----------------------------|-------------------|----------------------|---------------------|-------------------------------------------|-------|
| Age at enrollment           | 6.2742            | 0.0123               | 0.939               | 0.894                                     | 0.986 |
| Body Mass Index             | 0.6790            | 0.4099               | 0.984               | 0.948                                     | 1.022 |
| Number of prior pregnancies | 12.1498           | 0.0005               | 1.277               | 1.113                                     | 1.465 |
| White vs. other race        | 5.5396            | 0.0186               | 1.804               | 1.104                                     | 2.949 |
| Married (yes vs. no)        | 4.4437            | 0.0350               | 1.945               | 1.048                                     | 3.609 |
| Cohort (WWE vs. CW)         | 0.0041            | 0.9487               | 0.987               | 0.669                                     | 1.456 |

WWE = women with epilepsy; CW = control women.
